# Supplementary material for: AGER1 downregulation associates with fibrosis in nonalcoholic steatohepatitis and type 2 diabetes
Source: JCI journal article supplement (doi:10.1172/jci133051), 2020-07-12
Supplement: sd1 [file 1]

## Supplementary Figure 1.

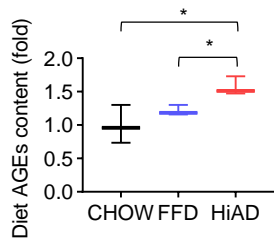

### Supplementary Figure 1. Diet composition and AGEs content of regular chow, fast food diet (FFD), and high AGE diet (HiAD).

Heating FFD at 121°C for 20 minutes significantly increased the amount of AGEs (3 different batches of each diet, \* $p < 0.05$ , Unpaired two tail t.test, Bar: 25-75 percentile, line: Median, whiskers: Min/ Max). Diet compositions of each diet are listed in Supplementary Table 1.

**Supplementary Table 1**

|                             | Regular CHOW # | Fast food diet (FFD) § | High AGEs content diet (HiAD) & |
|-----------------------------|----------------|------------------------|---------------------------------|
| Calories                    | 310 kcal/100g  | 449 kcal/100g          | 441 kcal/100g                   |
| Protein                     | 18.6%          | 17.4%                  | 16.7%                           |
| Carbohydrates               | 44.2%          | 49.9%                  | 56.8%                           |
| Fiber                       | 14.7%          | 5.0%                   | 5.6%                            |
| Fat                         | 6.2%           | 20.0%                  | 16.3%                           |
| Sucrose                     | -              | 34.0%                  | 32.4%                           |
| Cholesterol                 | -              | 2027 ppm               | 2030 ppm                        |
| Total Saturated Fatty Acids | 0.9%           | 12.09%                 | 10.21%                          |
| Polyunsaturated Fatty Acids | 3.4%           | 0.58%                  | 0.97%                           |
| Monounsaturated Fatty Acids | 1.3%           | 4.61%                  | 3.85%                           |

**Supplementary Table 1. Diet composition and AGEs content of regular chow, fast food diet (FFD), and high AGE diet (HiAD).** # Teklad Global 18% Protein Rodent Diet (Cat# 2918, data provided by the vendor Envigo), § AIN-76A Western Diet (Cat#1810060, data provided by the vendor TestDiet), & Prepared by heating FFD at 121° C for 20 minutes (data generated by Eurofins Scientific Testing laboratories company).

## Supplementary Figure 2.

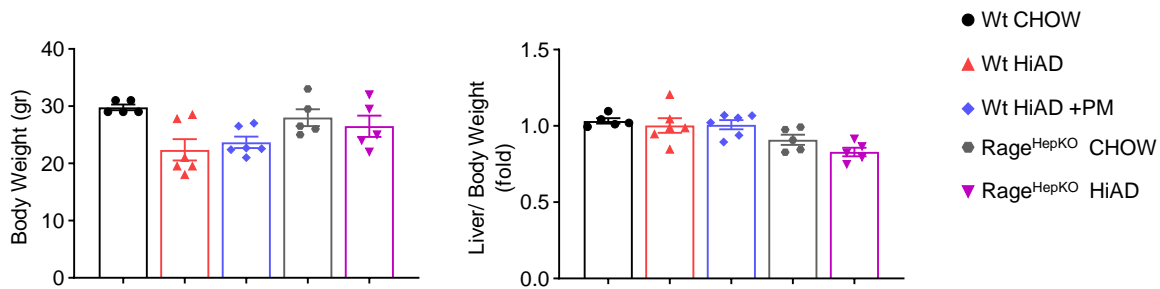

**Supplementary Figure 2. Body weights and liver/body weight ratios do not change significantly in the experimental groups.** *Fli/fli* and *Rage<sup>HepKO</sup>* mice were placed on chow or high AGE diet (HiAD) for 14 weeks with daily Pyridoxamine, i.p. (PM, 60 mg/kg) or vehicle injection. Body and liver weights were recorded at the end of the experiments. (Data are represented as mean±SEM; One-way ANOVA.)

### Supplementary Figure 3.

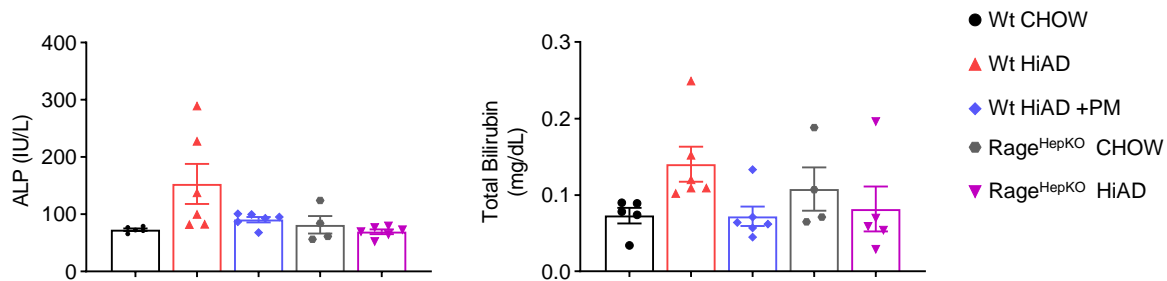

**Supplementary Figure 3. Alkaline phosphatase (ALP) and bilirubin showed trends in increase in HiAD fed mice.** *Fl/fl* and *Rage<sup>HepKO</sup>* mice were placed on chow or high AGE diet (HiAD) for 14 weeks with daily Pyridoxamine, i.p. (PM, 60 mg/kg) or vehicle injection. Serum ALP and serum total bilirubin were measured. (Data are represented as mean±SEM; One-way ANOVA).

Supplementary Figure 4.

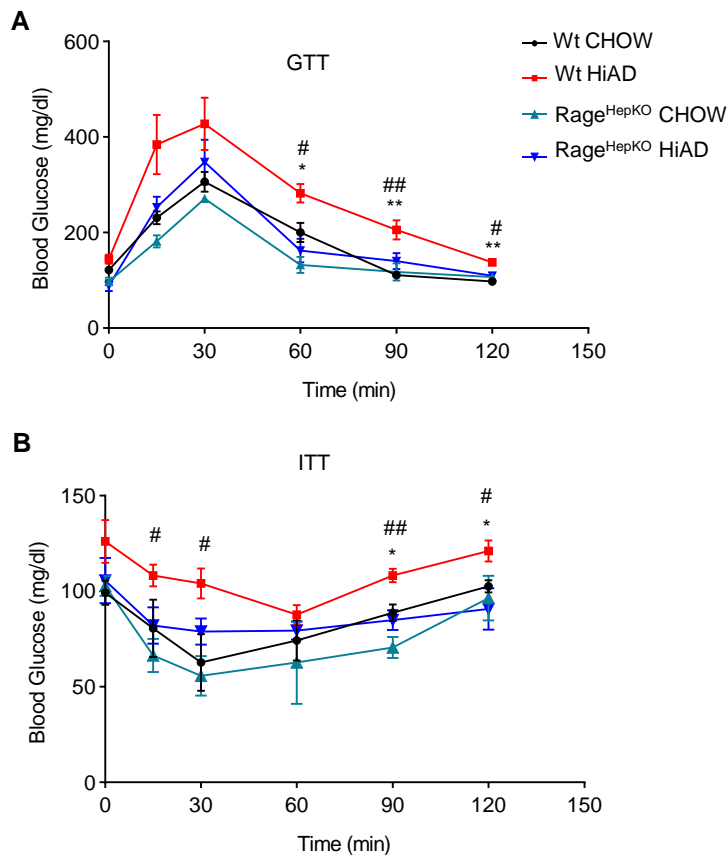

**Supplementary Figure 4. Glucose tolerance and insulin sensitivity are improved in *Rage*<sup>HepKO</sup> mice on HiAD. (A)** Glucose tolerance test (GTT) was performed in WT and *Rage*<sup>HepKO</sup> mice fed chow or HiAD for 14 weeks. Following overnight fasting, mice were injected i.p. with 2mg/g glucose, and glucose levels were measured at the indicated times. There was an improvement in glucose tolerance in *Rage*<sup>HepKO</sup> mice. **(B)** Insulin tolerance test (ITT) was performed after 4 hours fasting (1 mU/g, i.p. Insulin). *Rage* deletion in hepatocytes significantly improved insulin sensitivity in mice on HiAD (Mean  $\pm$  SEM, \* $p$ <0.05 WT CHOW vs HiAD, \*\* $p$ <0.01 WT CHOW vs HiAD, # $p$ <0.05 WT vs. *Rage*<sup>HepKO</sup> HiAD, ## $p$ <0.01 WT vs. *Rage*<sup>HepKO</sup> HiAD, One way ANOVA, followed by post hoc Tukey test.  $n$ = WT CHOW:4, WT HiAD: 6, *Rage*<sup>HepKO</sup> CHOW: 3, *Rage*<sup>HepKO</sup> HiAD: 6).

**Supplementary Figure 5.**

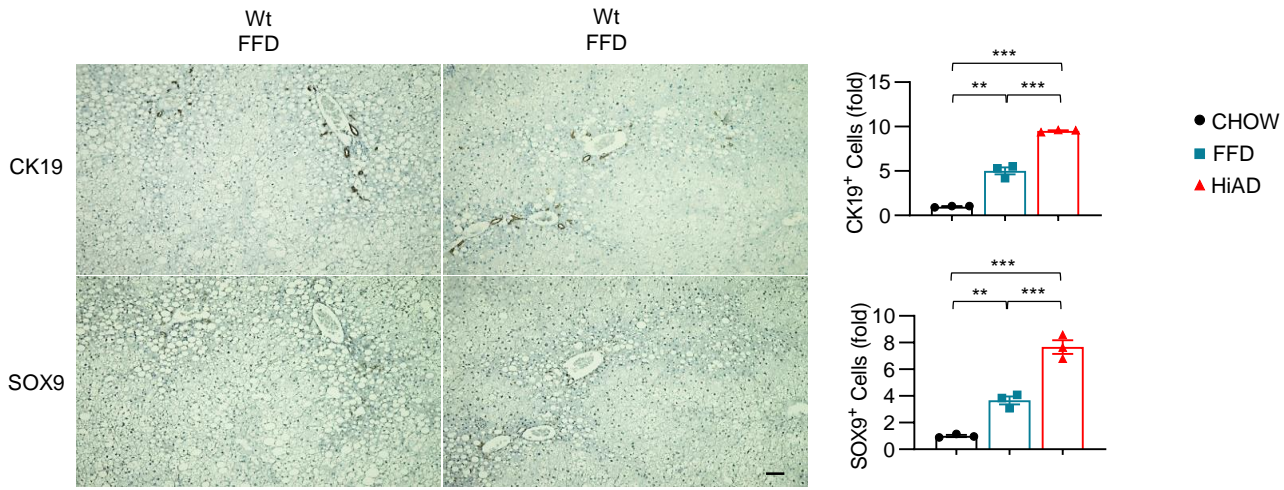

**Supplementary Figure 5. Representative images of CK19 and SOX9 immunohistochemistry and calculation of positive cells in *fl/fl* mice on fast food diet (FFD).** Immunohistochemistry of CK19 and SOX9 were performed on paraffin-embedded slides (For HiAD images, please see Figure 1F). The number of CK19/SOX9 positive cells was counted in 5 different fields in 3-4 mice/group. (Scale bar: 100µm, Data are represented as mean ± SEM; one way ANOVA followed by post-hoc Tukey test. \*\*p<0.01, \*\*\*p<0.001).

## Supplementary Figure 6.

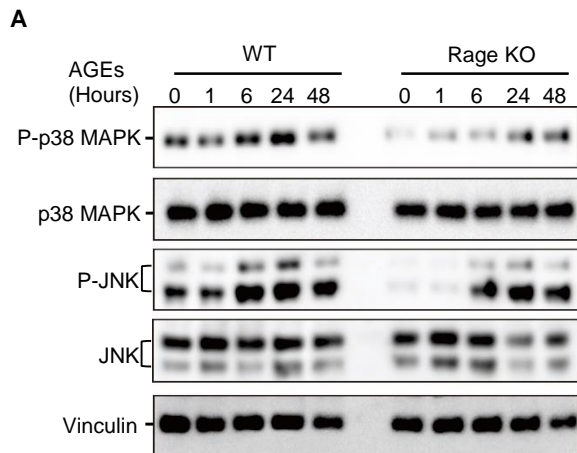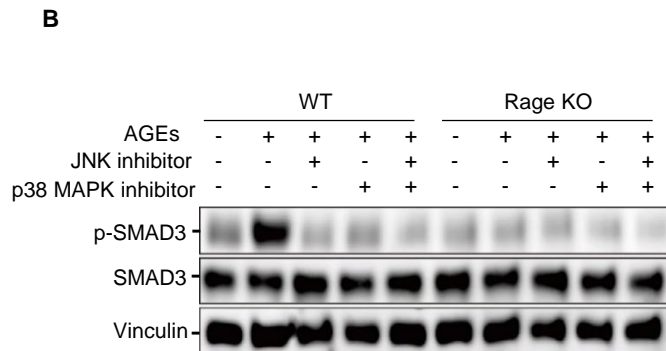

**Supplementary Figure 6. AGEs-mediated p38MAPK and JNK1/2 signals are involved in SMAD3 phosphorylation. (A)** Primary, *fl/fl* (WT) or *Rage* KO hepatocytes were treated with 100 $\mu$ g/ml AGEs-BSA for the indicated times. P38MAPK and JNK1/2 phosphorylation were induced in WT hepatocytes by AGEs, and this was attenuated in *Rage* KO cells. **(B)** Primary, WT or *Rage* KO hepatocytes were treated with 100 $\mu$ g/ml AGEs-BSA, in the presence or absence of JNK (10 $\mu$ M, SP600125) or p38MAPK inhibitor (10 $\mu$ M, SB203580). SMAD3 phosphorylation in WT cells was attenuated by the inhibitors.

Supplementary Figure 7.

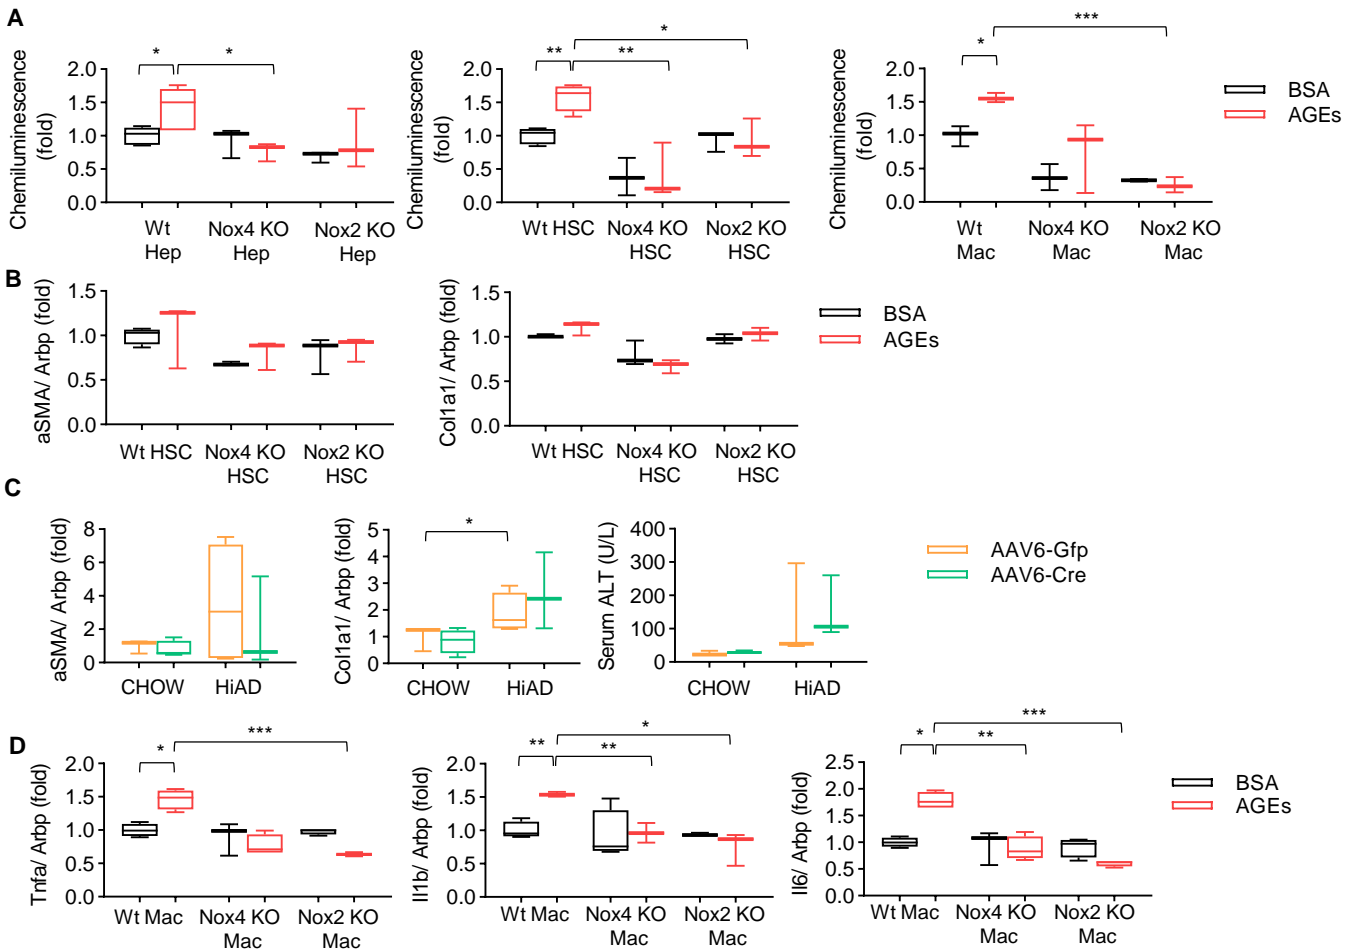

**Supplementary Figure 7. NOX4 and NOX2 are differentially involved in AGEs mediated ROS production in primary hepatocytes, hepatic stellate cells, and macrophages.** Primary hepatocytes (Hep), hepatic stellate cells (HSCs), and macrophages (Mac) were isolated from wild type (WT), *Nox4* KO, and *Nox2* KO mice and treated with 100ug/ml AGEs, or control BSA for 24 hours. **(A)** *Nox4* KO primary hepatocytes had significant reduction in ROS production. Both *Nox4* and *Nox2* KO HSC exhibited significant decrease in ROS production, whereas only *Nox2* KO macrophages had significantly less ROS. **(B)** RT-qPCR analysis of HSCs stimulated with AGEs did not show significant induction in *aSMA* and *Col1a1* expression. **(C)** *Rage* *fl/fl* mice were fed normal chow or HiAD diet for 14 weeks. To delete *Rage* in HSCs, after 7 weeks of feeding mice were injected with AAV6-cre (5x10<sup>11</sup> GC) or control AAV6-Gfp. Compared to AAV6-Gfp injected mice there was no reduction in *aSMA*, *Col1a1* or serum ALT levels. (D) Exposure to AGEs induced *Tnfa*, *Il1b*, and *Il6* expression in primary macrophages from WT mice. No induction was observed in *Nox4* KO and *Nox2* KO macrophages. (A, B, D: Data represent 3 independent experiments. \*p<0.05, \*\*p<0.01, \*\*\*p<0.001, Unpaired two-tailed *t* test. C: n=3-4 mice in each group, \*p<0.05, \*\*p<0.01, \*\*\*p<0.001, Unpaired two-tailed *t* test. Bar: 25-75 percentile, line: Median, whiskers: Min/ Max).



## A. Hepatocyte-HSC co-culture

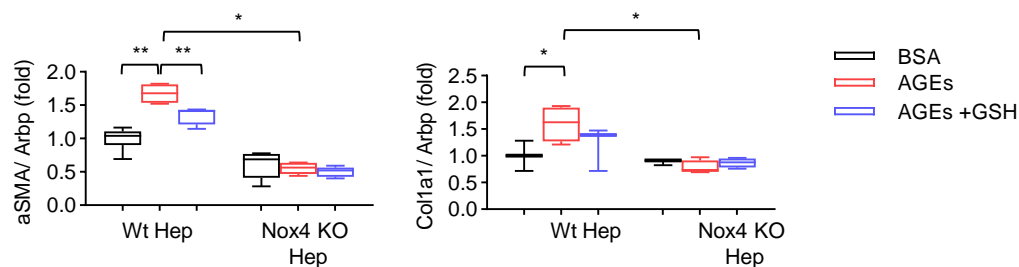

## B. Hepatocyte-macrophage co-culture

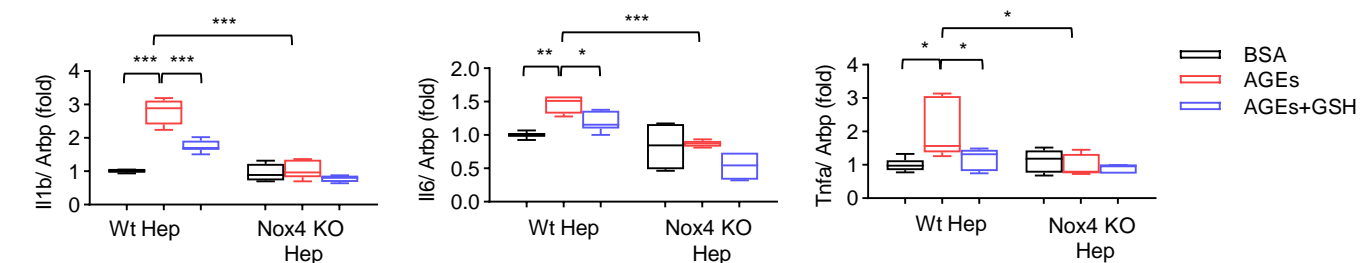

**Supplementary Figure 8. AGEs-treated hepatocytes induce hepatic stellate cell transdifferentiation and macrophage polarization in co-cultures.** Primary hepatocytes from WT or *Nox4* KO mice were isolated and treated with 100ug/ml AGEs with or without 10mM GSH. After 24 hours, medium was changed, and hepatic stellate cells (HSCs) or macrophages from WT mice were co-cultured with the hepatocytes using a transwell co-culture system. **(A)** AGEs-exposed WT but not *Nox4* KO hepatocytes significantly induced *aSMA* and *Col1a1* in primary HSCs. Scavenging ROS with GSH reduced HSC activation. **(B)** Macrophages exhibited significant induction of *Il1b*, *Il6*, and *Tnfa*, when co-cultured with AGEs-exposed WT but not *Nox4* KO hepatocytes. GSH treatment of hepatocytes significantly reduced *Il1b*, *Il6*, and *Tnfa* (data represent 3 independent experiments, \* p < 0.05, \*\* p < 0.01, \*\*\* p < 0.001. One way ANOVA followed by post hoc Tukey. Bar: 25-75 percentile, line: Median, whiskers: Min/ Max).

Supplementary Figure 9.

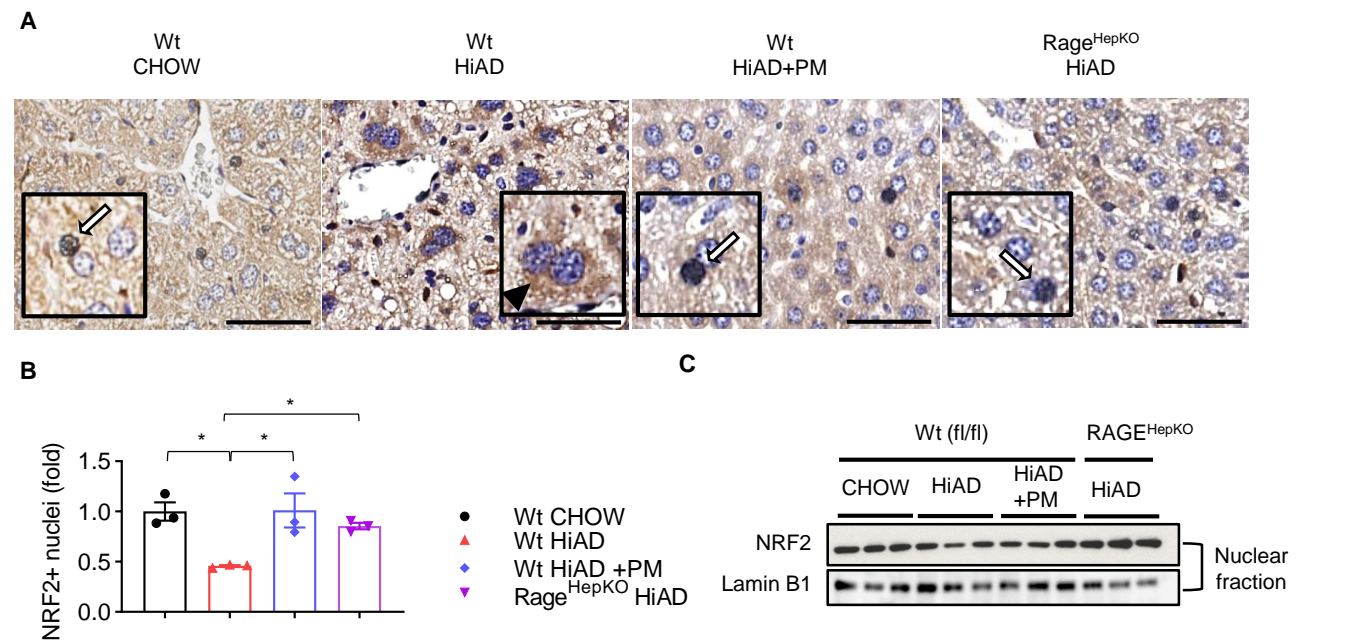

**Supplementary Figure 9. Nuclear NRF2 decreased in *fl/fl* (WT) mice on HiAD, nuclear translocation improved by PM and in *Rage*<sup>HepKO</sup> mice.** (A) Immunohistochemistry and (B) counting nuclear NRF2 in eight random fields/mouse (40X) demonstrates decreased nuclear NRF2 in WT mice on HiAD, and improved nuclear translocation in mice exposed to PM and in *Rage*<sup>HepKO</sup> mice. (C) Western blot analyses revealed lower nuclear NRF2 levels in WT mice on HiAD and increased nuclear NRF2 in *RAGE*<sup>HepKO</sup> mice on HiAD. (Mean ± SEM, \**p*<0.05, one way ANOVA and post hoc Tukey test).

Supplementary Figure 10.

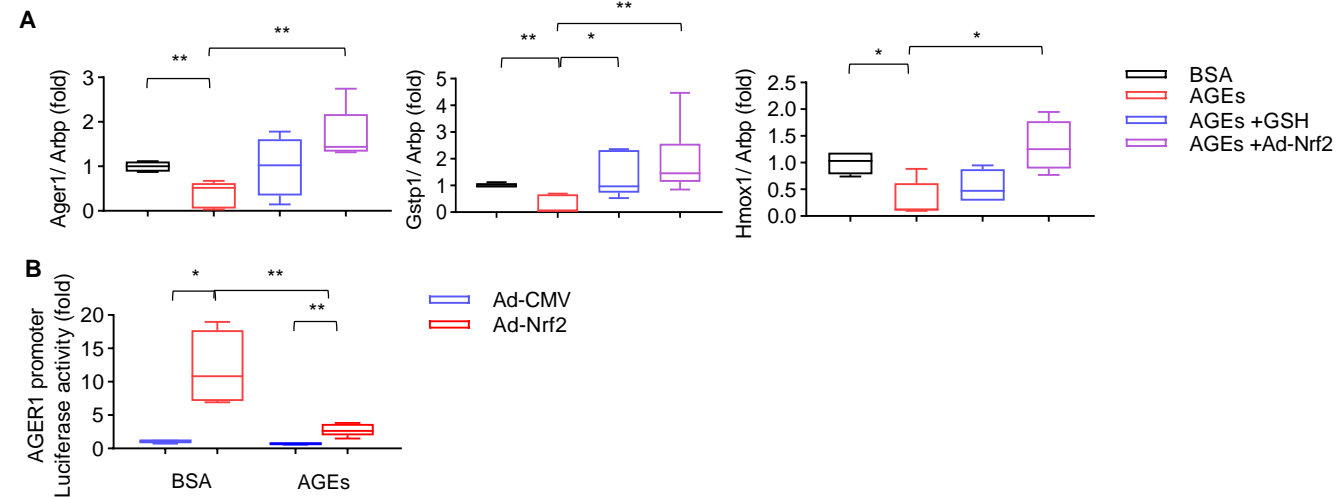

**Supplementary Figure 10. NRF2 reversed the effects of AGEs treatment in hepatocytes. (A)** In primary hepatocytes, NRF2 transduction by adeno-*Nrf2* (*Ad-Nrf2*) or treatment with reduced GSH reversed *Ager1* downregulation by AGEs, and improved the expression of NRF2 targets *Gstp1*, and *Hmox1*. **(B)** Human *AGER1* promoter was induced by *Ad-Nrf2*. (N=3, \*p<0.05, \*\*p<0.01. One-way ANOVA, and post hoc Tukey test. Bar: 25-75 percentile, line: Median, whiskers: Min/ Max).

**Supplementary Table 2. Sequence of the primers used in this study**

|                            |                                                                                   |
|----------------------------|-----------------------------------------------------------------------------------|
| <b>Mouse <i>Mcp1</i></b>   | Forward: 5'-CTTCTGGCCTGCTGTCA-3'<br>Reverse: 5'-CCAGCCTACTCATTGGGATCA-3'          |
| <b>Mouse <i>Tnfa</i></b>   | Forward: 5'-TCCCAGGTTCCTCTCAAGGGA-3'<br>Reverse: 5'-GGTGAGGAGCACGTAGTCGG-3'       |
| <b>Mouse <i>Il1b</i></b>   | Forward: 5'-CAACCAACAAGTGATATTCTCCATG-3'<br>Reverse: 5'-GATCCACACTCTCCAGCTGCA-3'  |
| <b>Mouse <i>Il6</i></b>    | Forward: 5'-CCCAATTTCCAATGCTCTC-3'<br>Reverse: 5'-TGAATTTGGATGGTCTTGGTC-3'        |
| <b>Mouse <i>Col1a1</i></b> | Forward: 5'-AGAGGCGAAGGCAACAGTCG-3'<br>Reverse: 5'-GCAGGGCCAATGTCTAGTCC-3'        |
| <b>Mouse <i>Tgfb</i></b>   | Forward: 5'-TGGAGCAACATGTGGAATCC-3'<br>Reverse: 5'-CAGCAGCCGGTTACCAAG-3'          |
| <b>Mouse <i>Mmp2</i></b>   | Forward: 5'-GGACAGTGACACCAGTCGACA-3'<br>Reverse: 5'-ACTCATTCCCTGCGAAGAACA-3'      |
| <b>Mouse <i>Nox4</i></b>   | Forward: 5'-TTGCCTGGAAGAACCCTAAGT-3'<br>Reverse: 5'-TCCGCACAATAAAGGCACA-3'        |
| <b>Mouse <i>Nox2</i></b>   | Forward: 5'-CCCTTTGGTACAGCCAGTGAAGAT-3'<br>Reverse: 5'-CAATCCCGGCTCCCCTAACATCA-3' |
| <b>Mouse <i>Ager1</i></b>  | Forward: 5'-TGGCAAGTCATCTGAACC-3'<br>Reverse: 5'-TGGGTGATTGGTTTATCTGGG-3'         |
| <b>Mouse <i>Gstp1</i></b>  | Forward: 5'-CCATAGATACCTGGATGCAAGG-3'<br>Reverse: 5'-TCCCATAAAGCCCCAAGAG-3'       |
| <b>Mouse <i>Hmox1</i></b>  | Forward: 5'-GTTCAAACAGCTCTATCGTGC-3'<br>Reverse: 5'-TCTTTGTGTTCTCTGTGAGC-3'       |
| <b>Mouse <i>Ngo1</i></b>   | Forward: 5'-CAAGTTTGGCCTCTCTGTGG-3'<br>Reverse: 5'-GATCTGGTTGTCAGCTGGAAT-3'       |
| <b>Mouse <i>Nrf2</i></b>   | Forward: 5'-GCCAGCACATCCAGACAGA-3'<br>Reverse: 5'-GGGATATCCAGGGCAAGCGA-3'         |
| <b>Mouse <i>Nae1</i></b>   | Forward: 5'-ACGTTGCCAAATTGCTTCAG-3'<br>Reverse: 5'-ATCCAAGCCATACTTTCAGC-3'        |
| <b>Mouse <i>Den1</i></b>   | Forward: 5'-AGCAAAGGAGACAACTGGTC-3'<br>Reverse: 5'-CGTACATCCACAGTCTAGC-3'         |
| <b>Mouse <i>Arbp</i></b>   | Forward: 5'-CAAAGCTGAAGCAAAGGAAGAG-3' Reverse: 5'-<br>AATTAAGCAGGCTGACTTGGTTG-3'  |
| <b>Human <i>RAGE</i></b>   | Forward: 5'-GCCAGAAGTGGAGCAGTAG-3'<br>Reverse: 5'-CCAGTGGATTGAGGAGAGG-3'          |
| <b>Human <i>AGER1</i></b>  | Forward: 5'-GTGTTCAAGGAGGGGTGT-3'<br>Reverse: 5'-GTGACAGTGTAGGCATTGGG-3'          |
| <b>Human <i>B2M</i></b>    | Forward: 5'-TTCTGGCCTGAGGCTATC-3'<br>Reverse: 5'-TCAGGAAATTTGACTTTCATTCC-3'       |

**Supplementary Table 3. Antibodies used in this study**

| Immunohistochemistry        |                               |             |               |                   |
|-----------------------------|-------------------------------|-------------|---------------|-------------------|
| Antibody                    | Manufacturer                  | Cat#        | Concentration | Description       |
| CK19                        | Abcam                         | ab133496    | 1:1000        | Rabbit monoclonal |
| SOX9                        | EMDmillipore                  | AB5535      | 1:1000        | Rabbit polyclonal |
| RAGE                        | Abcam                         | ab7764      | 1:100         | Goat polyclonal   |
| 4-Hydroxynonenal<br>(4-HNE) | Abcam                         | ab46545     | 1:500         | Rabbit polyclonal |
| NRF2                        | Abcam                         | ab62352     | 1:500         | Rabbit monoclonal |
| Immunoprecipitation         |                               |             |               |                   |
| SMAD3                       | Abcam                         | ab28379     | 10µg/ml       | Rabbit monoclonal |
| Western Blot                |                               |             |               |                   |
| CUL3                        | Cells Signaling<br>Technology | 2759        | 1:1000        | Rabbit polyclonal |
| NRF2                        | Abcam                         | ab31163     | 1:500         | Rabbit polyclonal |
| GAPDH                       | R&D Systems                   | 2275-PC-100 | 1:2000        | Rabbit polyclonal |
| Vinculin                    | Abcam                         | Ab129002    | 1:20000       | Rabbit monoclonal |
| SMAD3                       | Abcam                         | ab28379     | 1:1000        | Rabbit monoclonal |
| Phospho-SMAD3               | Abcam                         | ab52903     | 1:2000        | Rabbit monoclonal |
| JNK                         | Cells Signaling<br>Technology | 9252S       | 1:1000        | Rabbit polyclonal |
| Phospho-JNK                 | Cells Signaling<br>Technology | 9251S       | 1:1000        | Rabbit polyclonal |
| Phospho-p38<br>MAPK         | Cells Signaling<br>Technology | 4631S       | 1:1000        | Rabbit monoclonal |
| p38 MAPK                    | Cells Signaling<br>Technology | 8690S       | 1:1000        | Rabbit monoclonal |
| Lamin B1                    | Abcam                         | ab133741    | 1:1000        | Rabbit monoclonal |
